# Supplementary material for: Mental Health Issues in Madhya Pradesh: Insights from National Mental Health Survey of India 2016
Source: MDPI journal article supplement (doi:10.3390/healthcare7020053), 2019-03-31
Supplement: s1 [file s1]

**Miscellaneous tables:**

**Table 1: Distribution of study subjects by marital status and gender (%)**

| <b>Marital Status</b>      |             |
|----------------------------|-------------|
| <b><i>Total (n)</i></b>    | <b>2621</b> |
| <b>Male</b>                | <b>1254</b> |
| Never Married              | 19.6%       |
| Married                    | 78.4%       |
| Widowed/Divorced/Separated | 1.9%        |
| Others                     | 0.1%        |
| Total                      | 47.8%       |
| <b>Female</b>              | <b>1367</b> |
| Never Married              | 10.5%       |
| Married                    | 80.0%       |
| Widowed/Divorced/Separated | 9.4%        |
| Others                     | 0.1%        |
| Total                      | 52.2%       |
| <b>Total</b>               | <b>2621</b> |
| Never Married              | 14.9%       |
| Married                    | 79.2%       |
| Widowed/Divorced/Separated | 5.8%        |
| Others                     | 0.1%        |
| Total                      | 100.00%     |

**Table 2: Distribution of study subjects by education and gender (%)**

| <b>Education</b> |                |
|------------------|----------------|
|                  | <b>N= 2621</b> |
| <b>MALES</b>     | <b>n= 1254</b> |
| Illiterate       | 23.00%         |
| Primary          | 25.70%         |
| Secondary        | 16.30%         |
| High School      | 14.80%         |
| Pre-University   | 9.30%          |
| Vocational       | 2.10%          |
| Graduate         | 6.00%          |
| Post-Graduate    | 2.80%          |
| <b>FEMALES</b>   | <b>n= 1367</b> |
| Illiterate       | 47.80%         |
| Primary          | 18.90%         |
| Secondary        | 12.90%         |
| High School      | 8.30%          |
| Pre-University   | 5.30%          |
| Vocational       | 0.30%          |
| Graduate         | 4.30%          |
| Post-Graduate    | 1.50%          |
| <b>TOTAL</b>     | <b>n= 2621</b> |
| Illiterate       | 35.90%         |
| Primary          | 22.10%         |
| Secondary        | 14.50%         |
| High School      | 11.40%         |

|                |       |
|----------------|-------|
| Pre-University | 7.20% |
| Vocational     | 1.10% |
| Graduate       | 5.10% |
| Post-Graduate  | 2.10% |

**Table 3: Distribution of study subjects by occupation and gender (%)**

| <b>Characteristics</b>   | <b>%</b>    |
|--------------------------|-------------|
| <b>Male</b>              | <b>1254</b> |
| Cultivator               | 34.20%      |
| Agricultural Labourer    | 20.80%      |
| Employer                 | 1.90%       |
| Employee & Other workers | 26.80%      |
| Student                  | 7.10%       |
| Household duties         | 0.50%       |
| Dependent                | 6.40%       |
| Pensioner                | 0.70%       |
| Others                   | 1.60%       |
| <b>Female</b>            | <b>1367</b> |
| Cultivator               | 5.90%       |
| Agricultural Labourer    | 12.20%      |
| Employer                 | 0.10%       |
| Employee & Other workers | 6.70%       |
| Student                  | 4.20%       |
| Household duties         | 64.20%      |
| Dependent                | 5.80%       |
| Pensioner                | 0.50%       |
| Others                   | 0.20%       |
| <b>Total</b>             | <b>2621</b> |
| Cultivator               | 19.50%      |
| Agricultural Labourer    | 16.30%      |
| Employer                 | 1.00%       |

|                          |        |
|--------------------------|--------|
| Employee & Other workers | 16.30% |
| Student                  | 5.60%  |
| Household duties         | 33.70% |
| Dependent                | 6.10%  |
| Pensioner                | 0.60%  |
| Others                   | 0.90%  |

**Table 4: Household Income (Quintiles)**

| Household income |                    |        |
|------------------|--------------------|--------|
| Quintile         | HH Income (Median) | 5000   |
| Q1               | No of House holds  | 176    |
|                  | Min                | 0      |
|                  | Max                | 2500   |
|                  | Median             | 2000   |
| Q2               | No of House holds  | 169    |
|                  | Min                | 2600   |
|                  | Max                | 4000   |
|                  | Median             | 3000   |
| Q3               | No of House holds  | 226    |
|                  | Min                | 4100   |
|                  | Max                | 6900   |
|                  | Median             | 5000   |
| Q4               | No of House holds  | 170    |
|                  | Min                | 7000   |
|                  | Max                | 11500  |
|                  | Median             | 9000   |
| Q5               | No of House holds  | 177    |
|                  | Min                | 12000  |
|                  | Max                | 150000 |
|                  | Median             | 18500  |
